# Supplementary material for: Clinical characteristics and outcomes of adult patients admitted with COVID-19 in East London: a retrospective cohort analysis
Source: HighWire-hosted journal article supplement (doi:10.1136/bmjresp-2020-000813), 2021-03-01
Supplement: bmjresp-2020-000813supp001_data_supplement.pdf [file bmjresp-2020-000813supp001_data_supplement.pdf]

## 1 Supplemental material

### 1.1 PCR-only survival analysis

Table 1. Characteristics of patients admitted with PCR confirmed COVID-19 only by inpatient outcome, and adjusted hazard ratios from multivariable Cox regression

|                               | Total       | Deaths      | aHR        | 95% CI  | p      |
|-------------------------------|-------------|-------------|------------|---------|--------|
| <b>Overall</b>                | 1117        | 399         | -          | -       | -      |
| <b>Age / years (n = 1064)</b> |             |             |            |         |        |
| <b>Median (IQR)</b>           | 75 (60-85)  | 81 (72-87)  | -          | -       |        |
| <b>&lt;60</b>                 | 280 (25.1%) | 35 (8.8%)   | <i>Ref</i> | -       | <0.001 |
| <b>60-80</b>                  | 388 (34.7%) | 141 (35.3%) | 2.7        | 1.8-4.1 |        |
| <b>&gt;80</b>                 | 396 (35.5%) | 190 (47.6%) | 3.9        | 2.6-5.9 |        |
| <b>Gender (n = 1064)</b>      |             |             |            |         |        |
| <b>Women</b>                  | 449 (40.2%) | 130 (32.6%) | <i>Ref</i> | -       | 0.001  |
| <b>Men</b>                    | 615 (55.1%) | 236 (59.1%) | 1.4        | 1.1-1.8 |        |
| <b>Ethnicity (n = 1021)</b>   |             |             |            |         |        |
| <b>White</b>                  | 718 (64.3%) | 272 (68.2%) | <i>Ref</i> | -       | 0.1    |
| <b>Black</b>                  | 100 (9.0%)  | 24 (6.0%)   | 0.9        | 0.6-1.4 |        |
| <b>Asian</b>                  | 172 (15.4%) | 52 (13.0%)  | 1.5        | 1.1-2.1 |        |
| <b>Mixed</b>                  | 11 (1.0%)   | 4 (1.0%)    | 0.8        | 0.3-2.3 |        |
| <b>Other</b>                  | 20 (1.8%)   | 3 (0.8%)    | 0.7        | 0.2-2.1 |        |
| <b>Ward (n = 1117)</b>        |             |             |            |         |        |
| <b>General ward</b>           | 778 (69.7%) | 257 (64.4%) | -          | -       | -      |
| <b>Respiratory unit</b>       | 172 (15.4%) | 67 (16.8%)  | -          | -       | -      |
| <b>Critical care</b>          | 167 (15.0%) | 75 (18.8%)  | -          | -       | -      |

n = number individuals with data available; aHR = adjusted Hazard Ratios from Cox survival model adjusted for age, gender and ethnicity; CI = 95% confidence interval; p = p value of likelihood ratio test of hazard model with and without variable; ref = reference covariate.

## 1.2 Survival analysis

Test for independence between residuals and time with scaled Schoenfeld residuals.

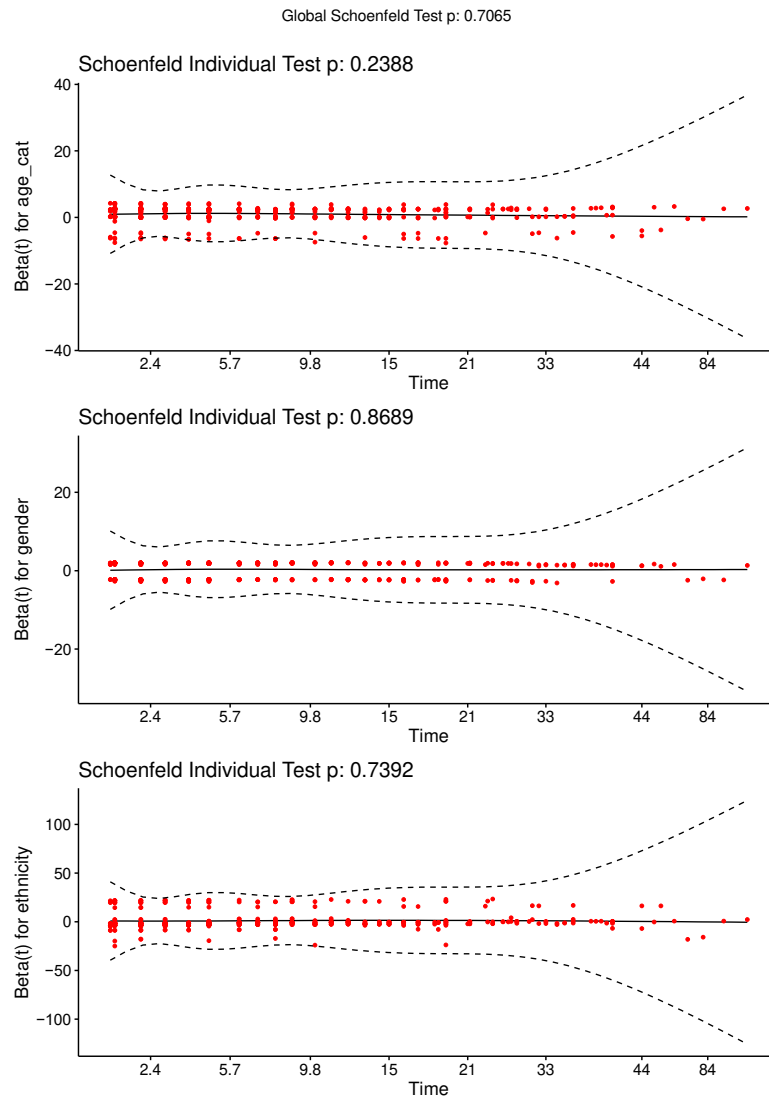

|           | CHISQ  | DF | P    |
|-----------|--------|----|------|
| AGE_CAT   | 2.8642 | 2  | 0.24 |
| GENDER    | 0.0272 | 1  | 0.87 |
| ETHNICITY | 1.9813 | 4  | 0.74 |
| GLOBAL    | 4.6180 | 7  | 0.71 |
